# Supplementary material for: Oxaliplatin‐ and docetaxel‐induced polyneuropathy: clinical and neurophysiological characteristics
Source: PubMed Central journal article supplement — J Peripher Nerv Syst. 2020 Oct 6;25(4):377–87. doi: 10.1111/jns.12413 (PMC7756561; doi:10.1111/jns.12413), 2020-10-06
Supplement: JNS-25-377-s001.pdf [file JNS-25-377-s001.pdf]

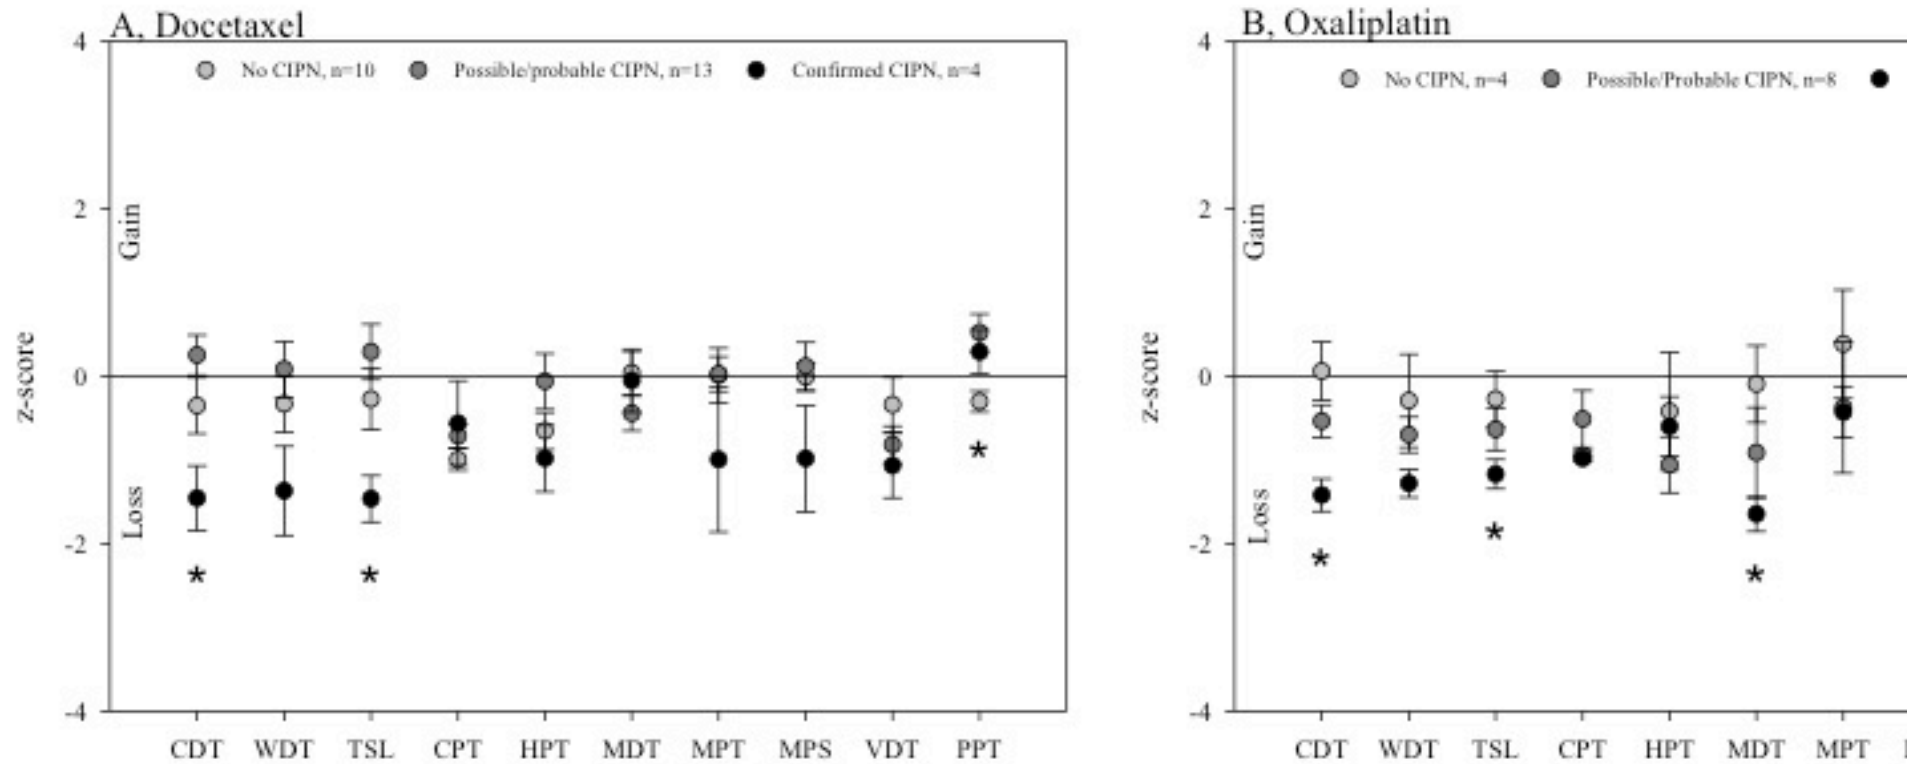

**FIGURE S1** Quantitative sensory testing showing z-scores indicating loss or gain in function on the 10 parameters. The comparisons were done confirmed CIPN in patients who had received A) docetaxel and B) oxaliplatin. . Patients with subclinical neuropathy are excluded (n = 2). Abbreviations: CIPN, chemotherapy-induced peripheral neuropathy; CDT, cold detection threshold; WDT, warm detection threshold; TSL, thermal s threshold; MDT, mechanical detection threshold; MPT, mechanical pain threshold; MPS, mechanical pain sensitivity; VDT, vibration detection thres  
 \*  $P$  value < 0.05
